# Supplementary material for: One step cathodically electrodeposited [Tb2(BDC)3(H2O)4]n thin film as a luminescent probe for Cu2+ detection
Source: Royal Society of Chemistry journal article supplement (doi:10.1039/c4ra09387a), 2014-01-01
Supplement: c4ra09387a1.pdf [file c4ra09387a1.pdf]

## Electronic Supplementary Information

### **One step cathodically electrodeposited $[\text{Tb}_2(\text{BDC})_3(\text{H}_2\text{O})_4]_n$ thin film as a luminescent probe for $\text{Cu}^{2+}$ detecting**

Yi Wang <sup>a</sup>, Tianshu Chu <sup>a</sup>, Minghao Yu <sup>a</sup>, Huiping Liu <sup>a</sup> and Yangyi Yang<sup>\*a</sup>

*<sup>a</sup>MOE Key Laboratory of Bioinorganic and Synthetic Chemistry, KLGHEI of  
Environment and Energy Chemistry, School of Chemistry and Chemical Engineering,  
Sun Yat-Sen University, Guangzhou, 510275, P. R. China.*

E-mail: cesyyy@mail.sysu.edu.cn

### 3.1 Influence of electrochemical parameters

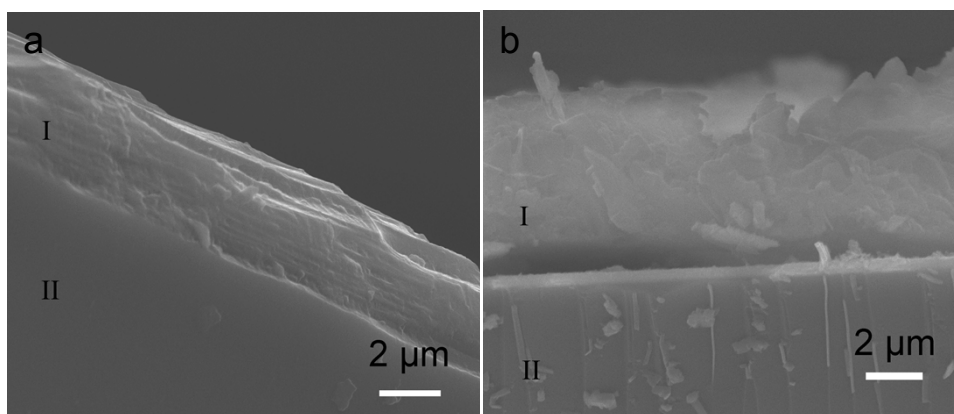

**Fig. S1** Thickness of film deposited with different deposition time (a) 20 minutes (b) 30 minutes in the solution (0.05M  $\text{NH}_4\text{NO}_3$ ) with  $0.3 \text{ mA} \cdot \text{cm}^{-2}$ . (I: film II: substrate)

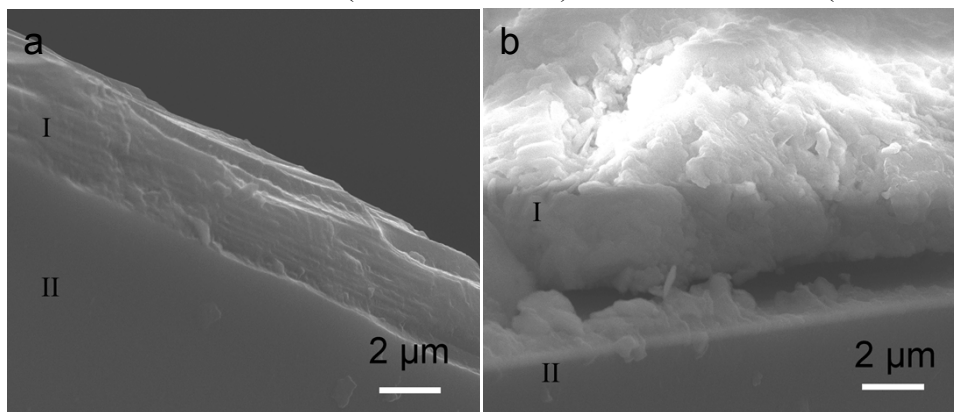

**Fig. S2** Thickness of film deposited with different  $\text{NH}_4\text{NO}_3$  concentration (a) 0.05M (b) 0.1M with  $0.3 \text{ mA} \cdot \text{cm}^{-2}$  in 20 minutes. (I: film II: substrate)

### 3.3 Selective detection of $\text{Cu}^{2+}$

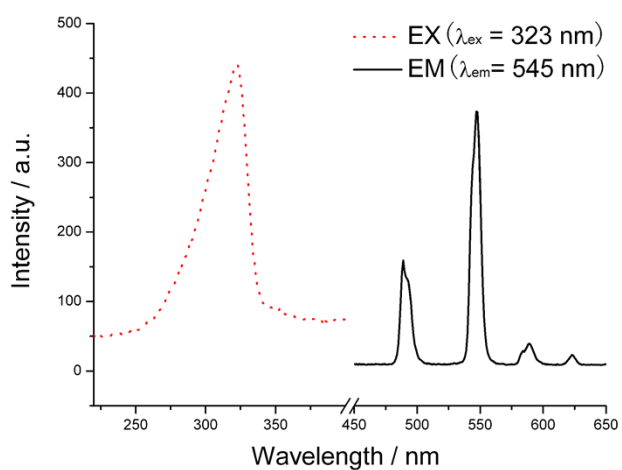

**Fig. S3** The excitation (dotted) and PL spectra (line) of thin film 1.
